## CORRECTION

# Correction: *Ex-vivo* cultured human corneoscleral segment model to study the effects of glaucoma factors on trabecular meshwork

Ramesh B. Kasetti, Pinkal D. Patel, Prabhavathi Maddineni, Gulab S. Zode

[Fig 4](#), [Fig 5](#) and [Fig 6](#) are incorrect—panels [Fig 4C](#), [Fig 5C](#) and [Fig 6D](#) are incomplete. The authors have provided the corrected versions here.

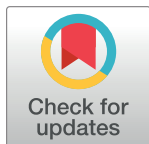

## OPEN ACCESS

**Citation:** Kasetti RB, Patel PD, Maddineni P, Zode GS (2020) Correction: *Ex-vivo* cultured human corneoscleral segment model to study the effects of glaucoma factors on trabecular meshwork. PLoS ONE 15(8): e0238408. <https://doi.org/10.1371/journal.pone.0238408>

**Published:** August 25, 2020

**Copyright:** © 2020 Kasetti et al. This is an open access article distributed under the terms of the [Creative Commons Attribution License](#), which permits unrestricted use, distribution, and reproduction in any medium, provided the original author and source are credited.

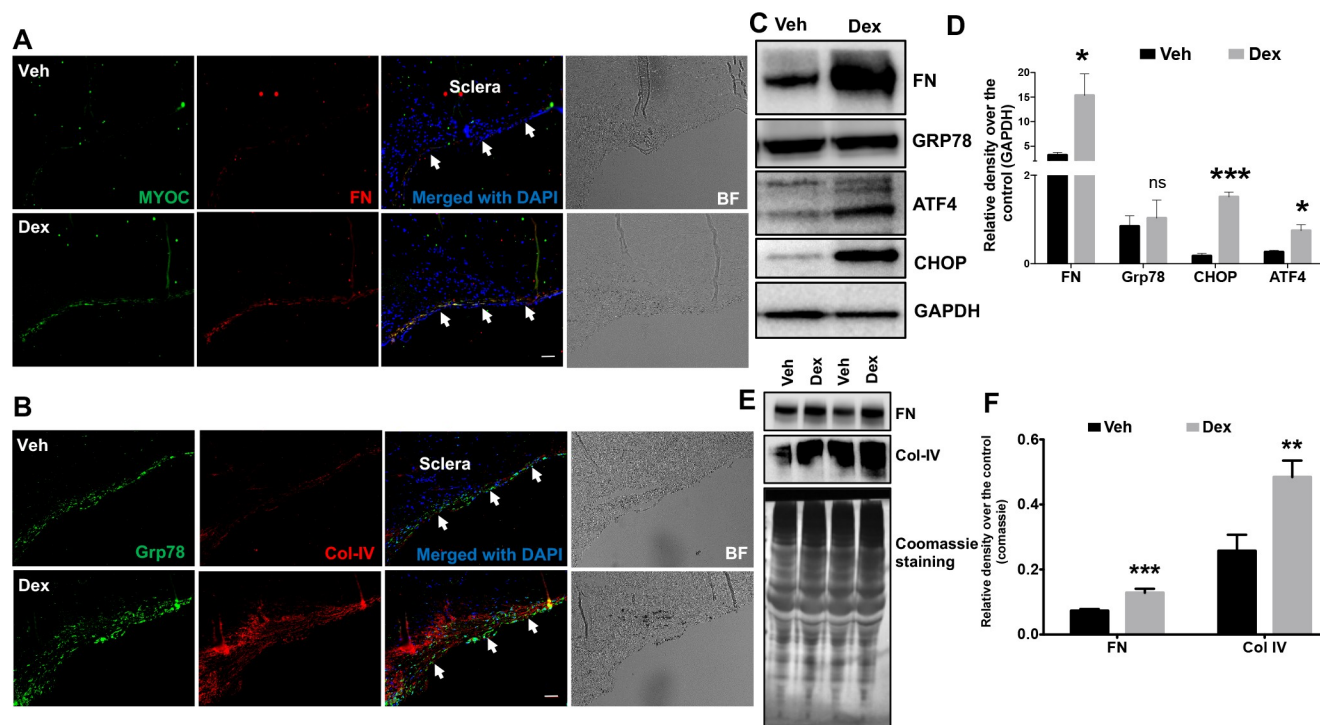

**Fig 4. Increased ECM accumulation and ER stress induction in the TM of Dex-treated cultured corneoscleral segments.** A) Immunostaining for myocilin and fibronectin, B) GRP78 (ER stress marker) and collagen IV in quadrants cultured for 7 days treated with the vehicle (0.1% ethanol) and Dex (100nM). Dex treatment prominently increased myocilin, fibronectin, collagen IV and GRP78 staining in the TM region. (n = 4 biological replicates, scale bar is 50μm). Western blot and densitometric analysis for FN (ECM marker) and ATF4, CHOP and GRP78 (ER stress markers) in TM tissue lysates (C-D) of vehicle- and Dex- (100nM) treated cultured corneoscleral segments. Dex treatment led to a significant increase in the ECM marker, FN (n = 3 biological replicates) and ER stress markers CHOP and ATF4 but not GRP78 (n = 4 biological replicates). Note that densitometric analysis included only Dex responders. Similarly, conditioned medium (E-F) from Dex-treated corneoscleral segments showed a significant increase in ECM proteins FN and Col IV (n = 8); unpaired t-test, \* $P < 0.05$ , \*\* $P < 0.01$ , \*\*\* $P < 0.001$ ). Arrows indicate the TM region.

<https://doi.org/10.1371/journal.pone.0238408.g001>

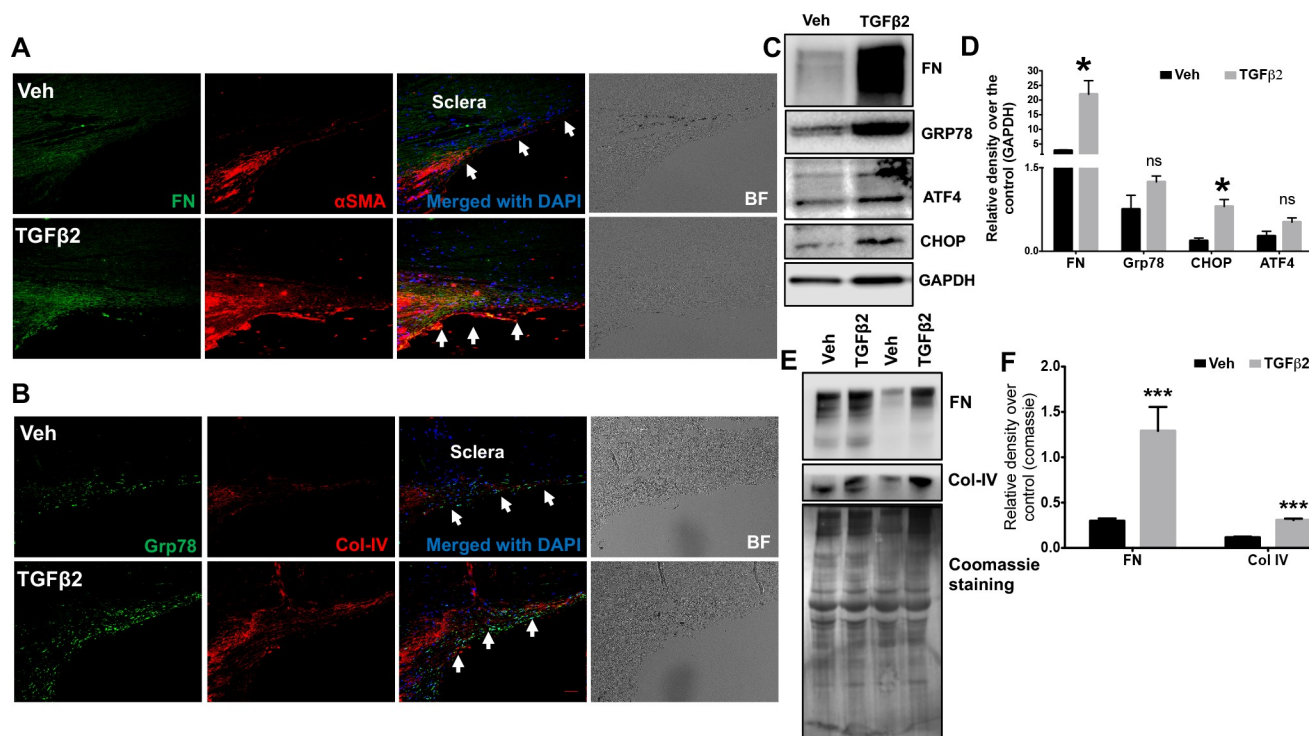

**Fig 5. Increased ECM accumulation in the TM of TGFβ2-treated cultured corneoscleral segments.** (A and B) Immunostaining for fibronectin (FN), collagen IV (Col-IV), αSMA and GRP78 in vehicle and TGFβ2 (5ng/ml) treated cultured corneoscleral segments. (n = 4 biological replicates, scale bar is 50μm). Western blot and densitometric analysis for FN, Col-IV (ECM markers), ATF4, CHOP, GRP78 in the TM tissue lysates (C-D) and conditioned medium (E-F) of vehicle and TGFβ2-treated cultured corneoscleral quadrants (n = 4 biological replicates for lysates and n = 8 for the conditioned medium), unpaired t-test, \* $P < 0.05$ , \*\* $P < 0.01$ , \*\*\* $P < 0.001$ . Arrows indicate the TM region.

<https://doi.org/10.1371/journal.pone.0238408.g002>

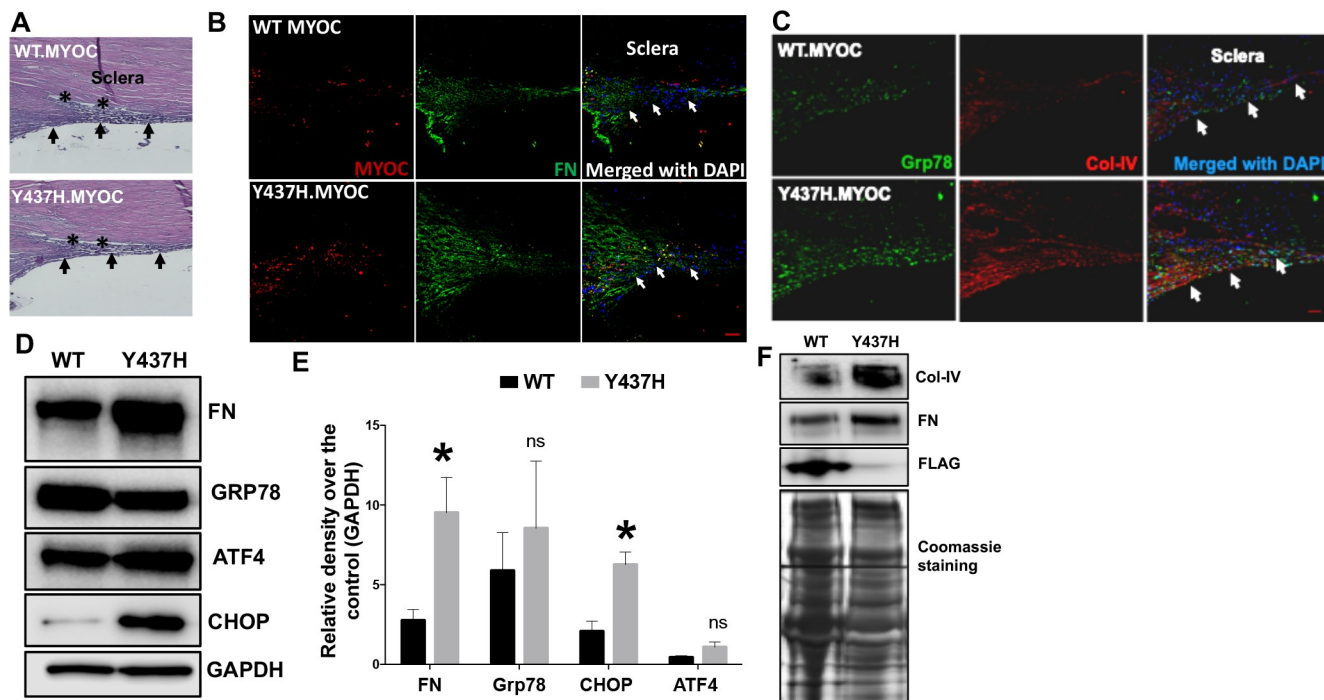

**Fig 6. Lentiviral expression of mutant myocilin induces ER stress and ECM changes in the TM of cultured corneoscleral segments.** The cultured corneoscleral quadrants were transduced with FTS tagged (FLAG & S tag) WT myocilin or mutant myocilin (Y437H) expressing lentiviral particles (1ml of lentivirus supernatant) for 7 days. **A)** H&E staining and **(B&C)** immunostaining for myocilin, FN, GRP78 and Col-IV in cultured corneoscleral segments transduced with WT or mutant myocilin. Increased myocilin staining was observed in the TM of mutant myocilin-transduced quadrants compared to WT myocilin. In addition, increased FN and Col-IV staining indicate more ECM accumulation in the TM of mutant myocilin-transduced quadrants ( $n = 3$  biological replicates, scale bar is  $50\mu\text{m}$ ). Western blot and densitometric analysis of TM tissue lysates **(D-E)** and conditioned medium **(F)** obtained from cultured quadrants transduced with WT and mutant myocilin lentiviral expression vectors. A significant increase in the ECM marker FN ( $n = 6$  biological replicates) and the ER stress marker CHOP ( $n = 3$  biological replicates) was observed in mutant myocilin-transduced TM tissue lysates. Similarly, conditioned medium **(F)** from mutant myocilin-treated corneoscleral segments showed increases in ECM proteins FN and Col IV. Moreover, WT myocilin was detected in conditioned media of WT myocilin-transduced quadrants while no myocilin was detected in quadrants expressing mutant myocilin indicating that expression of mutant myocilin inhibits its secretion and accumulates in the TM cells. Unpaired t-test, \* $P < 0.05$ , \*\* $P < 0.01$ , \*\*\* $P < 0.001$ . Arrows indicate the TM region.

<https://doi.org/10.1371/journal.pone.0238408.g003>

## Reference

1. Kasetti RB, Patel PD, Maddineni P, Zode GS (2020) *Ex-vivo* cultured human corneoscleral segment model to study the effects of glaucoma factors on trabecular meshwork. PLoS ONE 15(6): e0232111. <https://doi.org/10.1371/journal.pone.0232111> PMID: 32579557
